# Supplementary material for: A mixed-bridging ligand nonanuclear Ru(ii) dendrimer containing a tris- chelating core. Synthesis and redox propertiesElectronic supplementary information (ESI) available: ESMS relevant data with attribution of 2, detailed synthesis of 1 and conditions of the redox experiments. See http://www.rsc.org/suppdata/cc/b4/b400311j/
Source: Royal Society of Chemistry journal article supplement (doi:10.1039/b400311j), 2004-01-01
Supplement: b400311j.doc [file b400311j.doc]

**A mixed-bridging ligands nonanuclear Ru(II) dendrimer containing a tris-chelating ligand as the core. Synthesis and redox properties.**

J. Leveque, C. Moucheron, A. Kirsch-De Mesmaeker, F. Loiseau, S. Serroni, F. Puntoriero, S. Campagna, H. Nierengarten and A. Van Dorsselaer.

**Electronic Supplementary Information**

**Table ESI-1.** ESMS data of the trinuclear precursor **2.**

| **m/z** | **attribution** | **m/z calc.** | **Rel. Int.** |
| --- | --- | --- | --- |
| 879.8 | M4+ + 2 PF6- | 878.6 | 5% |
| 537.3 | M4+ + PF6- | 537.4 | 31% |
| 366.5 | M4+ | 366.8 | 100% |

*M4+ = 1467,4*

**Synthesis of** **[-HAT{Ru[(-2,3-dpp)Ru(bpy)2]2}3] (PF6)18 (1).**

25.3 mol (51.8 mg) of the trinuclear precursor **2** and 72.5 mol (12.3 mg) of AgNO3 were heated and stirred at reflux of EtOH (4 mL) for 2h. Afterwards, 7.5 mol (1.8 mg) of ligand HAT and 2 mL of ethylene glycol were added to the solution and the temperature increased to 110°C. The reaction, followed by absorption and emission spectroscopy, was finished after 16h. After cooling and centrifugation of the solid AgCl, an excess of NH4PF6 in aqueous solution was added in order to precipitate the complex formed. The precipitate was washed several times with water. Complex **1** was isolated by extraction in EtOH. Yield after purification: 25%.

**Conditions of the electrochemical experiments**

Experiments were carried out in argon-purged MeCN in one compartment cell. Working electrode: glassy carbon; counter-electrode: Pt wire; reference electrode: SCE; supporting electrolytes: N(but)4PF6, 0.1 mol/L. Potential sweep rate: from 50 to 500 mVs-1. Typical complex concentration, 5 10-4 mol/L.
